# Supplementary material for: Progress Toward Real-World Diagnostic Applications of Microfluidic Paper-Based Analytical Devices (µPADs)
Source: Royal Society of Chemistry journal article supplement (doi:10.1039/d5lc01085c), 2026-01-01
Supplement: d5lc01085c4.xlsx [file d5lc01085c4.xlsx]

## Sheet: Table S1 (Immunassays)
Table S1 Recent examples of µPADs (2018-2025) for medical diagnostic applications (immunoassays)
This is an extended version of Table 1 in the main text
Columns not shown in the main text tables are indicated with light blue colour column headings
(Blood separation) in parentheses indicates that no specific information is provided in the cited work. Since serrum is mentioned as the sample, a prior serum separation from whole blood is assumed
Analyte	Sample matrix	Real sample test	Sample type category	Concentration of measured clinical or spiked sample	Detection technique	Detection range	Detection limit	Storage stability	Assay time	Necessity of time control	Off-device pretreatment	Operation steps	Reagent handling	External equipment	Sample volume control	Article title	Ref
Tumor necrosis factor (TNF)-α	Rat tissue sample	Clinical sample (rat)	5	231.6 ± 103.09 pM (4 weeks after surgery) 69.9 ± 10.4 pM (2 days after surgery)	Colorimetric	N.A.	22 pM (PBS)	N.A.	31 min	No	No	Sample application Continuous flow of PBS	No Microcontroller driven	RGB color sensor Box with heater Pump	3 µL	A paper-based microfluidic platform with shape-memory-polymer-actuated fluid valves for automated multi-step immunoassays	H. Fu, P. Song, Q. Wu, C. Zhao, P. Pan, X. Li, N. Y. K. Li-Jessen and X. Liu, Microsyst. Nanoeng., 2019, 5, 50
Human interleukin-6 (IL-6)	Human saliva	Clinical sample	5	3.2–22.5 pg/mL	Colored length	0.05–25.0 pg/mL	0.05 pg/mL	Sealed bag 4°C ~7 weeks (no decrease) ~12 weeks (93.6%)	35 min	Yes Multiple operations	No	Sample application Reagent application Removal and insertion of paper bridge Reagent application	Yes HRP–antibody H2O2	No	15 µL	Distance-Based All-In-One Immunodevice for Point-of-Care Monitoring of Cytokine Interleukin-6	K. Khachornsakkul, W. Dungchai and N. Pamme, ACS Sens., 2022, 7, 2410-2419
Human interleukin-6 (IL-6)	Human urine	Clinical sample	5	3.88–18.10 pg/mL	Colored length	0.05–25.0 pg/mL	0.05 pg/mL	Sealed bag 4°C ~7 weeks (no decrease) ~12 weeks (93.6%)	35 min	Yes Multiple operations	No	Sample application Reagent application Removal and insertion of paper bridge Reagent application	Yes HRP–antibody H2O2	No	15 µL	Distance-Based All-In-One Immunodevice for Point-of-Care Monitoring of Cytokine Interleukin-6	K. Khachornsakkul, W. Dungchai and N. Pamme, ACS Sens., 2022, 7, 2410-2419
SARS-CoV-2	Exhaled breath	Clinical sample	4	N.A.	Echem (DPV)	3.7–10,000 ng/mL (Exhaled Breath)	1 ng/mL (Exhaled Breath)	4°C >33 days >90%	60 min	Yes Multiple operations	Off–chip post washing and detection	Reagent application Sample application Off–chip washing and echem measurement	Yes Antibody 1–Naphthyl phosphate Disodium salt	Microtube Potentiostat	>50 µL	Functionalized N95 Face Mask with a Chemical-Free Paper-Based Collector for Exhaled Breath Analysis: SARS-CoV-2 Detection with a Printed Immunosensor as a Case Study	L. Gutiérrez-Gálvez, N. Seddaoui, L. Fiore, L. Fabiani, T. García-Mendiola, E. Lorenzo and F. Arduini, ACS Sens., 2024, 9, 4047-4057
Hepatitis B virus (HBV)	Human serum	Clinical sample	4	44.61–420 pg/mL	Echem (CA)	0.1–250 ng/mL (PBS)	8.2 pg/mL (PBS)	–20°C >30 days 95.3–106.6 %	<500 s	No Immediate measurement	Blood separation	Sample application Buffer application Echem measurement	No	Potentiostat	15 µL	An automated fast-flow/delayed paper-based platform for the simultaneous electrochemical detection of hepatitis B virus and hepatitis C virus core antigen	S. Boonkaew, A. Yakoh, N. Chuaypen, P. Tangkijvanich, S. Rengpipat, W. Siangproh and O. Chailapakul, Biosens. Bioelectron., 2021, 193, 113543
Hepatitis C virus (HCV)	Human serum	Clinical sample	4	84.84–205.85 pg/mL	Echem (CA)	0.001–250 ng/mL (PBS)	1.19 pg/mL (PBS)	–20°C >30 days 95.3–106.6 %	<500 s	No Immediate measurement	Blood separation	Sample application Buffer application Echem measurement	No	Potentiostat	15 µL	An automated fast-flow/delayed paper-based platform for the simultaneous electrochemical detection of hepatitis B virus and hepatitis C virus core antigen	S. Boonkaew, A. Yakoh, N. Chuaypen, P. Tangkijvanich, S. Rengpipat, W. Siangproh and O. Chailapakul, Biosens. Bioelectron., 2021, 193, 113543
SARS-CoV-2	Human serum	Clinical sample	4	N.A.	Colorimetric	N.A.	5 nM (serum)	N.A.	15 min	Yes Multiple operations	(Blood separation) Treated with surfactant (biosafety reason) Pre–incubation	Mixing with reagent Sample application Buffer application Reagent application Imaging	Yes HRP–protein Immobilization protein TMB	Microtube Imager	25 µL (off–chip) 50 µL (on–chip)	Vertical Flow Cellulose-Based Assays for SARS-CoV-2 Antibody Detection in Human Serum	S. Kim, Y. Hao, E. A. Miller, D. M. Y. Tay, E. Yee, P. Kongsuphol, H. Jia, M. McBee, P. R. Preiser and H. D. Sikes, ACS Sens., 2021, 6, 1891-1898
SARS-CoV-2	Human serum	Clinical sample	4	N.A.	Colorimetric	N.A.	N.A. 89.5% accuracy	N.A.	<20 min	Yes Multiple operations	(Blood separation)	Buffer application Sample application Buffer application Changing top case Buffer and reagent application Detachement and imaging	Yes AuNP–antibody	Plastic box Smartphone	40 µL	A Paper-Based Multiplexed Serological Test to Monitor Immunity against SARS-COV-2 Using Machine Learning	M. Eryilmaz, A. Goncharov, G.-R. Han, H.-A. Joung, Z. S. Ballard, R. Ghosh, Y. Zhang, D. Di Carlo and A. Ozcan, ACS Nano, 2024, 18, 16819-16831
Cardiac troponin I (cTnI)	Human serum	Clinical sample	4	<40–4290 pg/mL	Colorimetric	–100 ng/mL (serum)	0.2 pg/mL (serum)	N.A.	<15 min	Yes Multiple operations	(Blood separation)	Buffer application Sample and reagent application Buffer application Changing top case Reagent application Detachement and imaging	Yes AuNP–antibody HAuCl4 NH2OH	Plastic box Smartphone	50 µL	Deep Learning-Enhanced Paper-Based Vertical Flow Assay for High-Sensitivity Troponin Detection Using Nanoparticle Amplification	G.-R. Han, A. Goncharov, M. Eryilmaz, H.-A. Joung, R. Ghosh, G. Yim, N. Chang, M. Kim, K. Ngo, M. Veszpremi, K. Liao, O. B. Garner, D. Di Carlo and A. Ozcan, ACS Nano, 2024, 18, 27933–27948
Cardiac troponin I (cTnI)	Human serum	Clinical sample	4	few–18 000 pg/mL	CL	0.001–100 ng/mL (serum)	0.16 pg/mL (serum)	N.A.	25 min	Yes Multiple operations	(Blood separation)	Buffer application Sample and reagent application Buffer application Changing top case Buffer application Changing top case Reagent application CL imaging	Yes AuNP-HEP-antibody Luminol H2O2	Plastic box Portable reader	50 µL	Deep Learning-Enhanced Chemiluminescence Vertical Flow Assay for High-Sensitivity Cardiac Troponin I Testing	G.-R. Han, A. Goncharov, M. Eryilmaz, S. Ye, H.-A. Joung, R. Ghosh, E. Ngo, A. Tomoeda, Y. Lee, K. Ngo, E. Melton, O. B. Garner, D. Di Carlo and A. Ozcan, Small, 2025, 21, 2411585
Anti-Borrelia burgdorferi antibody	Human serum	Clinical sample	4	N.A.	Colorimetric	N.A.	N.A. Sensitivity 90.5% Specificity 87.0% (n = 96)	N.A.	<15 min	Yes Multiple operations	(Blood separation)	Buffer application Sample application Change of top case Buffer application Disassemble Imaging	No	3D–printed cartridge Smartphone	20 µL	Point-of-Care Serodiagnostic Test for Early-Stage Lyme Disease Using a Multiplexed Paper-Based Immunoassay and Machine Learning	H.-A. Joung, Z. S. Ballard, J. Wu, D. K. Tseng, H. Teshome, L. Zhang, E. J. Horn, P. M. Arnaboldi, R. J. Dattwyler, O. B. Garner, D. Di Carlo and A. Ozcan, ACS Nano, 2020, 14, 229-240
Anti-Borrelia burgdorferi antibody	Human serum	Clinical sample	4	N.A.	Colorimetric	N.A.	N.A. Sensitivity 95.5% Specificity 100.0%	Room temperature >60 days 95%	<20 min	Yes Multiple operations	(Blood separation)	Buffer and sample application Changing top case Reagent application Detachement and imaging	Yes AuNP–antibody	Plastic box Smartphone	20 µL	Rapid single-tier serodiagnosis of Lyme disease	R. Ghosh, H.-A. Joung, A. Goncharov, B. Palanisamy, K. Ngo, K. Pejcinovic, N. Krockenberger, E. J. Horn, O. B. Garner, E. Ghazal, A. O’Kula, P. M. Arnaboldi, R. J. Dattwyler, A. Ozcan and D. Di Carlo, Nat. Commun., 2024, 15, 7124
Myoglobin	Human serum	Clinical sample	4	8.6–75 ng/mL	FL	N.A.	0.52 ng/mL (serum)	N.A.	<15 min	Yes Multiple operations	Blood separation Pre–mix with antibody	Buffer application Pre–mixing sample and reagent Sample application Buffer application Removing top case Inserting to phone reader Imaging	Yes AuNP-antibody	Plastic box Smartphone Light source and filter	50 µL	Deep Learning-Enabled Multiplexed Point-of-Care Sensor using a Paper-Based Fluorescence Vertical Flow Assay	A. Goncharov, H.-A. Joung, R. Ghosh, G.-R. Han, Z. S. Ballard, Q. Maloney, A. Bell, C. T. Z. Aung, O. B. Garner, D. D. Carlo and A. Ozcan, Small, 2023, 19, 2300617
Creatine kinase-MB (CK-MB)	Human serum	Clinical sample	4	1.1–23.4 ng/mL	FL	N.A.	0.3 ng/mL (serum)	N.A.	<15 min	Yes Multiple operations	Blood separation Pre–mix with antibody	Buffer application Pre–mixing sample and reagent Sample application Buffer application Removing top case Inserting to phone reader Imaging	Yes AuNP-antibody	Plastic box Smartphone Light source and filter	50 µL	Deep Learning-Enabled Multiplexed Point-of-Care Sensor using a Paper-Based Fluorescence Vertical Flow Assay	A. Goncharov, H.-A. Joung, R. Ghosh, G.-R. Han, Z. S. Ballard, Q. Maloney, A. Bell, C. T. Z. Aung, O. B. Garner, D. D. Carlo and A. Ozcan, Small, 2023, 19, 2300617
Heart-type fatty acid binding protein (FABP)	Human serum	Clinical sample	4	1.3–45.7 ng/mL	FL	N.A.	0.49 ng/mL (serum)	N.A.	<15 min	Yes Multiple operations	Blood separation Pre–mix with antibody	Buffer application Pre–mixing sample and reagent Sample application Buffer application Removing top case Inserting to phone reader Imaging	Yes AuNP-antibody	Plastic box Smartphone Light source and filter	50 µL	Deep Learning-Enabled Multiplexed Point-of-Care Sensor using a Paper-Based Fluorescence Vertical Flow Assay	A. Goncharov, H.-A. Joung, R. Ghosh, G.-R. Han, Z. S. Ballard, Q. Maloney, A. Bell, C. T. Z. Aung, O. B. Garner, D. D. Carlo and A. Ozcan, Small, 2023, 19, 2300617
C-Reactive Protein (CRP)	Human serum	Diluted clinical sample	3	0–10, 83.6 mg/L	Colorimetric	0–10 mg/L (serum)	N.A.	N.A.	<12 min	Yes Multiple operations	(Blood separation) 10 times dilution with buffer	Buffer application Sample and reagent application Running buffer Disassemble Imaging	Yes AuNP-antibody	3D–printed cartridge Smartphone	50 µL	Deep learning-enabled point-of-care sensing using multiplexed paper-based sensors	Z. S. Ballard, H.-A. Joung, A. Goncharov, J. Liang, K. Nugroho, D. Di Carlo, O. B. Garner and A. Ozcan, NPJ Digit. Med., 2020, 3, 66
Anti-interferon-γ autoantibodies (anti-IFN-γ Abs)	Human serum	Diluted clinical sample	3	111.09–1937.44 µg/mL	Colorimetric	0.003–3 μg/mL (PBS)	0.001 μg/mL (smartphone) 0.03 µg/mL (naked eye) (PBS)	N.A.	<10 min	No >10 min	(Blood separation) 100-fold dilution with PBS	Sample and buffer application Imaging	No	(Smartphone)	20 µL	One-Step Gold Nanoparticle Signal Amplification in a 3D Paper-Based Device for Rapid Detection of Anti-Interferon-γ Autoantibodies	Y.-S. Chien, U.-I. Wu, Y.-H. Pan and C.-F. Chen, Biosens. Bioelectron., 2025, 287, 117724
SARS-CoV-2	Human saliva	Spiked into biofluid sample	2	10–160 pg/mL	Colorimetric	10–160 pg/mL (saliva)	10 pg/mL (saliva)	N.A.	8 min	Yes Multiple operations	No	Reagent application Sample application Centrifugation for 5 times Imaging	Yes AuNP-antibody	Centrifuge Black box Smartphone	25 µL	μPADs on Centrifugal Microfluidic Discs for Rapid Sample-to-Answer Salivary Diagnostics	S. Liu, Y. Hou, Z. Li, C. Yang and G. Liu, ACS Sens., 2023, 8, 3520-3529
Cardiac troponin I (cTnI)	Human whole blood	Spiked into biofluid sample	2	90 pg/mL–90 ng/mL	Echem (EIS)	90 pg/mL to 90 ng/mL (artificial blood plasma)	4.6 pg/mL (190 fM) (artificial blood plasma)	N.A.	46 min	Yes Multiple operations	No	Folding and sample application Floding and buffer application Detaching Peeling off and folding paper Reagent application Echem meausrement	Yes Fe(CN)63-/4-	Potentiostat	20 µL	Paper-Based All-in-One Origami Nanobiosensor for Point-of-Care Detection of Cardiac Protein Markers in Whole Blood	H. Fu, Z. Qin, X. Li, Y. Pan, H. Xu, P. Pan, P. Song and X. Liu, ACS Sens., 2023, 8, 3574-3584
Brain natriuretic peptide (BNP)	Human whole blood	Spiked into biofluid sample	2	6 pg/mL–6 ng/mL	Echem (EIS)	6 pg/mL to 6 ng/mL (artificial blood plasma)	1.2 pg/mL (40 fM) (artificial blood plasma)	N.A.	46 min	Yes Multiple operations	No	Folding and sample application Floding and buffer application Detaching Peeling off and folding paper Reagent application Echem meausrement	Yes Fe(CN)63-/4-	Potentiostat	20 µL	Paper-Based All-in-One Origami Nanobiosensor for Point-of-Care Detection of Cardiac Protein Markers in Whole Blood	H. Fu, Z. Qin, X. Li, Y. Pan, H. Xu, P. Pan, P. Song and X. Liu, ACS Sens., 2023, 8, 3574-3584
D-Dimer	Human whole blood	Spiked into biofluid sample	2	91 ng/mL–91 µg/mL	Echem (EIS)	91 ng/mL to 91 μg/mL (artificial blood plasma)	146 pg/mL (730 fM) (artificial blood plasma)	N.A.	46 min	Yes Multiple operations	No	Folding and sample application Floding and buffer application Detaching Peeling off and folding paper Reagent application Echem meausrement	Yes Fe(CN)63-/4-	Potentiostat	20 µL	Paper-Based All-in-One Origami Nanobiosensor for Point-of-Care Detection of Cardiac Protein Markers in Whole Blood	H. Fu, Z. Qin, X. Li, Y. Pan, H. Xu, P. Pan, P. Song and X. Liu, ACS Sens., 2023, 8, 3574-3584
HIV1	Porcine whole blood	Spiked into biofluid sample	2	50–150 nM	BL	N.A.	2.8 nM (porcine serum)	Capped vials with argon, silica gel -20°C >2 months	21 min	No 21–30 min*	No	Sample application Imaging	No	Camera Box	30–60 µL	Paper-Based Antibody Detection Devices Using Bioluminescent BRET-Switching Sensor Proteins	K. Tenda, B. Van Gerven, R. Arts, Y. Hiruta, M. Merkx and D. Citterio, Angew. Chem. Int. Ed., 2018, 57, 15369-15373
Hemagglutinin (HA)	Porcine whole blood	Spiked into biofluid sample	2	50–150 nM	BL	N.A.	7.1 nM (porcine serum)	Capped vials with argon, silica gel -20°C >2 months	21 min	No 21–30 min*	No	Sample application Imaging	No	Camera Box	30–60 µL	Paper-Based Antibody Detection Devices Using Bioluminescent BRET-Switching Sensor Proteins	K. Tenda, B. Van Gerven, R. Arts, Y. Hiruta, M. Merkx and D. Citterio, Angew. Chem. Int. Ed., 2018, 57, 15369-15373
Dengue virus type 1 (DEN1)	Porcine whole blood	Spiked into biofluid sample	2	50–150 nM	BL	N.A.	19.3 nM (porcine serum)	Capped vials with argon, silica gel -20°C >2 months	21 min	No 21–30 min*	No	Sample application Imaging	No	Camera Box	30–60 µL	Paper-Based Antibody Detection Devices Using Bioluminescent BRET-Switching Sensor Proteins	K. Tenda, B. Van Gerven, R. Arts, Y. Hiruta, M. Merkx and D. Citterio, Angew. Chem. Int. Ed., 2018, 57, 15369-15373
Hepatitis B virus (HBV)	Porcine whole blood	Spiked into biofluid sample	2	0.005–200 ng/mL	FL	N.A.	2.8 ng/mL (porcine whole blood)	Wrapped with reagent paper in aluminum bag with a silica gel pack -20°C >28 days >80%	45 min	Yes Multiple operations	No	Sample application Folding and buffer application Folding and buffer application Discarding and folding Buffer application Discarding FL meausrement	No	Smarthone Fluorescence readout platform	5 µL	Origami Paper-Based Immunoassay Device with CRISPR/Cas12a Signal Amplification	H. Suzuki, G. Tong, P. Nath, Y. Hiruta and D. Citterio, ACS Sens., 2025, 10, 1811-1821
HIV-1	Human plasma	Spiked into biofluid sample	2	0–30 ng/mL	Colorimetric	0.03–3 ng/mL (plasma)	0.03 ng/mL (plasma)	N.A.	<10 min	Yes (color timer on device)	Blood separation	Sample application Pulling device and buffer application Pulling device and reagent application Imaging	Yes TMB	(Smartphone)	3 µL	An electricity- and instrument-free infectious disease sensor based on a 3D origami paper-based analytical device	C.-A. Chen, H. Yuan, C.-W. Chen, Y.-S. Chien, W.-H. Sheng and C.-F. Chen, Lab Chip, 2021, 21, 1908-1915
α-Fetoprotein	Human serum	Spiked into biofluid sample	2	0.1–100 ng/mL	Echem (EIS)	0.01–500 ng/mL (9 min) 0.5 pg/mL to 10 ng/mL (30 min)	1.65 pg/mL (9 min) 3.54 fg/mL (30 min)	4°C <15 days 105%	9 min 30 min	Yes Multiple operations	(Blood separation)	Sample and buffer application Device rotation for 4 times Echem measurement	No	Potentiostat	20 µL	Hand-Operated, Paper-Based Rotational Vertical-Flow Immunosensor for the Impedimetric Detection of α-Fetoprotein	A. Yakoh, E. Mehmeti, K. Kalcher and S. Chaiyo, Anal. Chem., 2022, 94, 5893-5900
Procalcitonin	Synthetic serum	Spiked into artificial biofluid sample	1	2–10 µg/mL	AR	2–10 µg/mL (serum)	2 µg/mL (serum)	N.A.	84 min	Yes Multiple operations	(Blood separation) Pre–mix with anti–target antibody	Pre-incubation Sample application Washing Reagent application Washing for three times Imaging	Yes Biotin-antibody Streptavidin-AuNP	Smartphone	1 µL	A Robust and User-Friendly Alternative to Densitometry Using Origami Biosensors and Digital Logic	S. M. Russell, A. Alba-Patiño, M. Borges and R. de la Rica, ACS Sens., 2018, 3, 1712-1718
α-fetoprotein	Buffer	N.A.	-	N.A.	Echem (CA)	10–100 ng/mL (KNO3)	0.63 ng/mL (KNO3)	N.A.	33 min	Yes Multiple operations	N.A.	Sample application Washing Reagent application Moving PAD Echem measurement	Yes Fe(CN)63-/4-	Potentiostat	1 µL	3D Capillary-Driven Paper-Based Sequential Microfluidic Device for Electrochemical Sensing Applications	A. Yakoh, S. Chaiyo, W. Siangproh and O. Chailapakul, ACS Sens., 2019, 4, 1211-1221
Plasmodium falciparum histidine-rich protein 2 (PfHRP2)	PBS	N.A.	-	N.A.	MS	N.A.	5 nM (PBS)	N.A.	>10 min	Yes Multiple operations	N.A.	Sample and buffer application Removal of capture layer Device assembly NH4OH application MS analysis	Yes NH4OH	MS spectrometer	20 µL	Automated Immunoassay Performed on a 3D Microfluidic Paper-Based Device for Malaria Detection by Ambient Mass Spectrometry	S. Jackson, S. Lee and A. K. Badu-Tawiah, Anal. Chem., 2022, 94, 5132-5139.

## Sheet: Table S2 (Nucleic acid tests)
Table S2 Recent examples of µPADs (2018-2025) for medical diagnostic applications (nucleic acid testing)
This is an extended version of Table 2 in the main text
Columns not shown in the main text tables are indicated with light blue colour column headings
Analyte	Sample matrix	Real sample test	Sample type category	Concentration of measured clinical or spiked sample	Detection technique	Detection range	Detection limit	Storage stability	Assay time	Necessity of time control	Off-device pretreatment	Operation steps	Reagent handling	External equipment	Sample volume control	Article title	Ref
Circulating tumor DNA (ctDNA)	Mice serum	Clinical sample (mice)	4	N.A.	Colorimetric	200–1500pM (serum)	95.81 pM (serum)	4°C >15 days ~90%	63 min (on chip)	Yes Multiple operations	Blood separation DNA extraction Annealing Pre–mix with probe	Pre-mixing of sample and reagent Sample application Buffer application Cutting device Reagent application Imaging	Yes Nanozyme–DNA TMB H2O2	Culture dish Incubator Smartphone 3D–printed dark box	2.5 µL	Pop-Up Paper-Based Biosensor for a Dual-Mode Lung Cancer ctDNA Assay Based on Novel CoB Nanosheets with Dual-Enzyme Activities and a Portable Smartphone/Barometer for Readout	S. Yang, J. Zhu, L. Yang, H. Fa, Y. Wang, D. Huo, C. Hou, D. Zhong and M. Yang, ACS Sens., 2025, 10, 133-147
Circulating tumor DNA (ctDNA)	Mice serum	Clinical sample (mice)	4	N.A.	63 min (on chip)	200–1500pM (serum)	79.88 pM (serum)	4°C >15 days ~90%	63 min (on chip)	Yes Multiple operations	Blood separation DNA extraction Annealing Pre–mix with probe	Pre-mixing of sample and reagent Sample application Buffer application Cutting device Reagent application Imaging	Yes Nanozyme–DNA TMB H2O2	Culture dish Incubator Microtube Gas pressure meter	~2.5 µL (no details)	Pop-Up Paper-Based Biosensor for a Dual-Mode Lung Cancer ctDNA Assay Based on Novel CoB Nanosheets with Dual-Enzyme Activities and a Portable Smartphone/Barometer for Readout	S. Yang, J. Zhu, L. Yang, H. Fa, Y. Wang, D. Huo, C. Hou, D. Zhong and M. Yang, ACS Sens., 2025, 10, 133-147
SARS-CoV-2	Human saliva	Clinical sample	5	N.A.	Colorimetric	N.A.	50 copies/μL (saliva)	N.A.	60 min	Yes Single reaction Automated sequential reagent addition	No	Sample, reagent, and buffer application Sealing Water pouring	Yes Proteinase K Amplification-related reagent (without primers)	IH module (no power supply)	20 µL	Point-of-Care Toolkit for Multiplex Molecular Diagnosis of SARS-CoV-2 and Influenza A and B Viruses	D. Lee, C.-H. Chu and A. F. Sarioglu, ACS Sens., 2021, 6, 3204-3213
SARS-CoV-2	Swab sample	Clinical sample	4	N.A.	FL	102–104 copies	102 copies	Room temperature >30 days	20 min (off-chip) 40 min (on-chip)	Yes Single reaction (without clear kinetic data)	RNA extraction	Sample and reagent application Sealing FL measurement	Yes Amplification-related reagent	Heating plate FL meter	1 µL	Autonomous lab-on-paper for multiplexed, CRISPR-based diagnostics of SARS-CoV-2	K. Yin, X. Ding, Z. Li, M. M. Sfeir, E. Ballesteros and C. Liu, Lab Chip, 2021, 21, 2730-2737
SARS-CoV-2	Swab sample	Clinical sample	4	N.A.	Echem (amperometry)	0.05–100 nM (PBS)	0.12 pM (PBS)	4°C >4 weeks 90–110 %	<25 min (extraction) 52 min (on-chip)	Yes Multiple operations	RNA extraction	Sample application Buffer application Device assebmle Reagent application Echem meausrement	Yes Fe(CN)63-/4-	Potentiostat	3 µL	Peptide nucleic acid probe-assisted paper-based electrochemical biosensor for multiplexed detection of respiratory viruses	A. Lomae, K. Teekayupak, P. Preechakasedkit, E. Pasomsub, T. Ozer, C. S. Henry, D. Citterio, T. Vilaivan, O. Chailapakul and N. Ruecha, Talanta, 2024, 279, 126613
SARS-CoV-2	Swab sample	Clinical sample	4	348–156,036 copies/μL	Colorimetric	N.A.	400 copies/μL (smartphone) 2400 copies/μL (naked–eye)	N.A.	<30 min	Yes Multiple operations	RNA extraction	Sample application Folding for three times Imaging	No	3D–printed attachment (Smartphone)	5 µL	A paper-based assay for the colorimetric detection of SARS-CoV-2 variants at single-nucleotide resolution	T. Zhang, R. Deng, Y. Wang, C. Wu, K. Zhang, C. Wang, N. Gong, R. Ledesma-Amaro, X. Teng, C. Yang, T. Xue, Y. Zhang, Y. Hu, Q. He, W. Li and J. Li, Nat. Biomed. Eng., 2022, 6, 957-967
Human papillomavirus (HPV)	Swab sample	Clinical sample	4	N.A.	FL	1–105 fM	1 fM	N.A.	35 min	Yes Multiple operations	RNA extraction Reverse transcription and digestion	Sample and MgOAc application Opening valve Folding and reagent addition FL imaging	Yes MgOAc FAM-ssDNA-quencher	Incubator Black box Portable fluorescence detector	5 µL	CRISPR/Cas on Microfluidic Paper-Based Analytical Devices for Point-of-Care Screening of Cervical Cancer	S. Liu, T. Yu, L. Song, K. Kalantar-Zadeh and G. Liu, ACS Sens., 2025, 10, 4569–4579
Human papillomavirus (HPV) subtypes	Swab sample	Clinical sample	4	N.A.	FL	N.A.	1–100 aM	N.A.	40 min	Yes Multiple operations	DNA extraction Pre–amplification	Sample application Sealing FL imaging	Yes Amplification-related reagent	Heater FL meter	7.5 µL	Programmable Multiplexed Nucleic Acid Detection by Harnessing Specificity Defect of CRISPR-Cas12a	X. Guan, R. Yang, J. Zhang, J. Moon, C. Hou, C. Guo, L. Avery, D. Scarola, D. S. Roberts, R. LaSala and C. Liu, Adv. Sci., 2025, 12, 2411021
Influenza (H1N1)	Swab sample	Clinical sample	4	N.A.	Echem (amperometry)	0.05–1000 nM (PBS)	0.35 pM (PBS)	4°C >4 weeks 90–110 %	<25 min (extraction) 52 min (on–chip)	Yes Multiple operations	RNA extraction	Sample application Buffer application Device assembly Reagent application Echem meausrement	Yes Fe(CN)63-/4-	Potentiostat	3 µL	Peptide nucleic acid probe-assisted paper-based electrochemical biosensor for multiplexed detection of respiratory viruses	A. Lomae, K. Teekayupak, P. Preechakasedkit, E. Pasomsub, T. Ozer, C. S. Henry, D. Citterio, T. Vilaivan, O. Chailapakul and N. Ruecha, Talanta, 2024, 279, 126613
Respiratory syncytial virus (RSV)	Swab sample	Clinical sample	4	N.A.	Echem (amperometry)	10–1000 nM (PBS)	0.36 pM (PBS)	4°C >4 weeks 90–110 %	<25 min (extraction) 52 min (on–chip)	Yes Multiple operations	RNA extraction	Sample application Buffer application Device assembly Reagent application Echem meausrement	Yes Fe(CN)63-/4-	Potentiostat	3 µL	Peptide nucleic acid probe-assisted paper-based electrochemical biosensor for multiplexed detection of respiratory viruses	A. Lomae, K. Teekayupak, P. Preechakasedkit, E. Pasomsub, T. Ozer, C. S. Henry, D. Citterio, T. Vilaivan, O. Chailapakul and N. Ruecha, Talanta, 2024, 279, 126613
Hepatitis B virus	Human serum	Clinical sample	4	5.27–5.39 log copies/µL	Echem (SWV)	10 pM to 2 μM (PBS)	7.23 pM (PBS)	4°C <1 month 110%	7 min	Yes Single reaction Automated sequential reagent addition	(Blood separation) DNA extraction	Sample application Echem measurement	No	Potentiostat	200 µL (off chip) 50 µL (on chip)	Amplification-free DNA Sensor for the One-Step Detection of the Hepatitis B Virus Using an Automated Paper-Based Lateral Flow Electrochemical Device	C. Srisomwat, A. Yakoh, N. Chuaypen, P. Tangkijvanich, T. Vilaivan and O. Chailapakul, Anal. Chem., 2021, 93, 2879-2887
Dengue virus (DEN)	Human serum	Clinical sample	4	N.A.	Colorimetric	N.A.	5 copies (serum)	<30°C >30 hr	~30 min	Yes Multiple operations	Blood separation	Pre-mixning sample and lysis buffer Samle application Washing for three times Membrane placement Buffer application Reagent application Sealing	Yes Lysis buffer Ethanol Amplification-related reagent	Waste container Portable heater	~50 µL	All-Serotype Dengue Virus Detection through Multilayered Origami-Based Paper/Polymer Microfluidics	P. Biswas, G. N. Mukunthan Sulochana, T. N. Banuprasad, P. Goyal, D. Modak, A. K. Ghosh and S. Chakraborty, ACS Sens., 2022, 7, 3720-3729
Dengue virus	Human serum	Clinical sample	4	N.A.	FL	N.A.	10 copies (serum)	N.A.	<1 hr	Yes Multiple operations	(Blood separation) DNA extraction on different device	Sample and buffer application Reagent application Sample collection Mix with buffer Sample transfer Sample applicatoin FL measurement	Yes NaOH	Humid petri dish Heater Fluorescence meter	20 µL	Paper-based nucleic acid testing system for simple and early diagnosis of mosquito-borne RNA viruses from human serum	B. S. Batule, Y. Seok and M.-G. Kim, Biosens. Bioelectron., 2020, 151, 111998
Zika virus	Human serum	Clinical sample	4	N.A.	FL	N.A.	10 copies (serum)	N.A.	<1 hr	Yes Multiple operations	(Blood separation) DNA extraction on different device	Sample and buffer application Reagent application Sample collection Mix with buffer Sample transfer Sample applicatoin FL measurement	Yes NaOH	Humid petri dish Heater Fluorescence meter	20 µL	Paper-based nucleic acid testing system for simple and early diagnosis of mosquito-borne RNA viruses from human serum	B. S. Batule, Y. Seok and M.-G. Kim, Biosens. Bioelectron., 2020, 151, 111998
Let-7a (miRNA)	Human serum	Diluted clinical sample	3	N.A.	BL	2 fM to 50 pM	1.7 fM	Silica gel desiccation Room temperature >3 months	15 min (off-chip) 150 min (on-chip)	Yes Multiple operations	RNA extraction (Blood separation) 2.5 times dilution with water	Sample application Overlapping paper disc Reagent application Imaging	Yes Luciferin	Incubator 3D–printed dark box Smartphone	20 µL	Portable and Field-Ready Detection of Circulating MicroRNAs with Paper-Based Bioluminescent Sensing and Isothermal Amplification	Y. Li, L. Zhou, W. Ni, Q. Luo, C. Zhu and Y. Wu, Anal. Chem., 2019, 91, 14838-14841
SARS-CoV-2	Human saliva	Spiked into biofluid sample	2	6 µM	BL	N.A.	40 nM (30 % (v/v) saliva)	Sealed bags Room temperature <7 weeks	7–12 min	Yes Single reaction	(RNA extraction)	Sample application Sealing BL imaging	No	3D printed cassette Heater Camera	15 µL	Towards detection of SARS-CoV-2 RNA in human saliva: A paper-based cell-free toehold switch biosensor with a visual bioluminescent output	J. P. Hunt, E. L. Zhao, T. J. Free, M. Soltani, C. A. Warr, A. B. Benedict, M. K. Takahashi, J. S. Griffitts, W. G. Pitt and B. C. Bundy, N. Biotechnol., 2022, 66, 53-60
Influenza A viruses	Saliva	Spiked into biofluid sample	2	0.5-5000 copies/µL	Colorimetric	N.A.	50 copies/μL (saliva)	N.A.	60 min	Yes Single reaction Automated sequential reagent addition	No	Sample, reagent, and buffer application Sealing Water puring	Yes Proteinase K Amplification-related reagent (without primers)	IH module (no power supply)	20 µL	Point-of-Care Toolkit for Multiplex Molecular Diagnosis of SARS-CoV-2 and Influenza A and B Viruses	D. Lee, C.-H. Chu and A. F. Sarioglu, ACS Sens., 2021, 6, 3204-3213
Influenza B viruses	Saliva	Spiked into biofluid sample	2	0.5-5000 copies/µL	Colorimetric	N.A.	50 copies/μL (saliva)	N.A.	60 min	Yes Single reaction Automated sequential reagent addition	No	Sample, reagent, and buffer application Sealing Water puring	Yes Proteinase K Amplification-related reagent (without primers)	IH module (no power supply)	20 µL	Point-of-Care Toolkit for Multiplex Molecular Diagnosis of SARS-CoV-2 and Influenza A and B Viruses	D. Lee, C.-H. Chu and A. F. Sarioglu, ACS Sens., 2021, 6, 3204-3213
HIV-1	Human whole blood	Spiked into biofluid sample	2	3–3x105 copies/mL	FL	N.A.	3 × 103 copies/mL (whole blood)	N.A.	30 min (extraction) >10 min (post amplification)	Yes Multiple operations	Post DNA isothermal amplification	Sample application Filter membrane removal Sealing Buffer application Cutting membrane Transfer to RPA tube FL measurement	Yes Amplification-related reagent	Cissors Microtube Heater FL meter	33 µL	Nucleic acid sample preparation from whole blood in a paper microfluidic device using isotachophoresis	B. P. Sullivan, A. T. Bender, D. N. Ngyuen, J. Y. Zhang and J. D. Posner, J. Chromatogr. B, 2021, 1163, 122494
MRSA	Blood	Spiked into biofluid sample	2	50 copies	FL	1–104 copies (35 min) 105–108 copies (42 min)	1 copy (42 min)	Room temperature >35 days 81.25%	36 or 43 min	Yes Single reaction (without clear kinetic data)	DNA extraction	Sample and water application Sealing Real–time FL measurement	No	Heater FL meter	1 µL	Fluorometric Paper-Based, Loop-Mediated Isothermal Amplification Devices for Quantitative Point-of-Care Detection of Methicillin-Resistant Staphylococcus aureus (MRSA)	I. Choopara, A. Suea-Ngam, Y. Teethaisong, P. D. Howes, M. Schmelcher, A. Leelahavanichkul, S. Thunyaharn, D. Wongsawaeng, A. J. Demello, D. Dean and N. Somboonna, ACS Sens., 2021, 6, 742-751
Chikungunya	Human serum	Spiked into biofluid sample	2	N.A.	FL	N.A.	10 copies (serum)	N.A.	<1 hr	Yes Multiple operations	(Blood separation) DNA extraction on different device	Sample and buffer application Reagent application Sample collection Mix with buffer Sample transfer Sample applicatoin FL measurement	Yes NaOH	Humid petri dish Heater FL meter	20 µL	Paper-based nucleic acid testing system for simple and early diagnosis of mosquito-borne RNA viruses from human serum	B. S. Batule, Y. Seok and M.-G. Kim, Biosens. Bioelectron., 2020, 151, 111998
SARS-CoV-2	N.A. (aerosol generated by breathing simulator)	Spiked into artificial biofluid sample	1	50–5×106 copies	Colorimetric	N.A.	17 aM	N.A.	30 min (sample collection) ~1.5 h (on chip)	No Automated sequential reaction	No	Sample collection Button push	No	No	No (mask)	Wearable materials with embedded synthetic biology sensors for biomolecule detection	P. Q. Nguyen, L. R. Soenksen, N. M. Donghia, N. M. Angenent-Mari, H. De Puig, A. Huang, R. Lee, S. Slomovic, T. Galbersanini, G. Lansberry, H. M. Sallum, E. M. Zhao, J. B. Niemi and J. J. Collins, Nat. Biotechnol., 2021, 39, 1366-1374
Pathogens DNA (E. coli, S. aureus, P. aeruginosa, K. pneumoniae, A. baumannii)	Swab (mimicking bacterial contamination on bench)	Spiked into artificial biofluid sample	1	103–106 CFU/mL	FL	1–106 copies/ μL (PBS)	1 copy/μL (PBS)	N.A.	<60 min	Yes Multiple operations	No	Sample and buffer application Putting on a heater Putting on a detecter FL imaging	No	Heater Plastic case Digital fluorescence detection module	20 µL	An integrated and paper-based microfluidic system employing LAMP-CRISPR and equipped with a portable device for simultaneous detection of pathogens	S. Cui, K. Wang, Y. Yang, X. Lv and X. Li, Anal. Bioanal. Chem., 2024, 417, 785–797
HIV-1	Human whole blood 6.25-fold diluted with buffer	Spiked into diluted biofluid sample	1	3 × 105 copies	Colorimetric	N.A.	3 × 105 copies (whole blood)	In bags with silica gel desiccant Room temperature >3 weeks	90 min	No Custom-designed electronic device controlled	(RNA extraction)	Sample application Device assemble Buffer application Heating	No	Portable heater and circuit	75 µL	Microfluidic rapid and autonomous analytical device (microRAAD) to detect HIV from whole blood samples	E. A. Phillips, T. J. Moehling, K. F. K. Ejendal, O. S. Hoilett, K. M. Byers, L. A. Basing, L. A. Jankowski, J. B. Bennett, L.-K. Lin, L. A. Stanciu and J. C. Linnes, Lab Chip, 2019, 19, 3375-3386
Mpox virus	Artificial urine or saliva (25-fold diluted)	Spiked into diluted biofluid sample	1	1–100 pM	Colorimetric	10–1000 copies/mL (urine, saliva)	~5 copies/mL (urine, saliva)	55°C >30 days >95%	<30 min	Yes Multiple operations	DNA extraction Anealing Pre-incubation	Pre-mixing sample and reagent Pre-mixing two reagents separately Pre-mix above two solutions Sample application Imaging	Yes AgNO3 Urease	Incubator Microtubes Colorimeter	200 µL	Intended Mismatch DNA Nanocomplexes for Ultrasensitive, Enzymatic Colorimetric Detection of MPOX Virus in Minutes Using a Paper-Based Fast-Flow Micromixing Device	L. Hongtanee, S. Chaiyo, H. Wu and A. Yakoh, Adv. Healthc. Mater., 2025, 14, 2404320
HPV16	N.A.	N.A.	-	N.A.	Echem (SWV)	N.A.	1 copy/µL	N.A.	130 min	Yes Multiple operations	(DNA extraction) Fragmentation Pre-RPA amplification Pre-CRISPR reaction	Buffer application Pre-mixing sample and reagent Sample, buffer and reagent application Echem emasurement	Yes (no reagent storage)	Potentiostat	10 µL	Paper-Based Laser-Pyrolyzed Electrofluidics: An Electrochemical Platform for Capillary-Driven Diagnostic Bioassays	L. Bezinge, J. M. Lesinski, A. Suea-Ngam, D. A. Richards, A. J. deMello and C.-J. Shih, Adv. Mater., 2023, 35, 2302893
Human papilloma virus (HPV)	Buffer	N.A.	-	N.A.	Echem (personal glucose meter)	N.A.	57 pM	Aluminium–coated pouches with a silica gel -20°C >4 weeks	120 min	Yes Multiple operations	(DNA extraction)	Sample application Film removal Buffer application Echem measurement	No	Personal glucose meter	10 µL	Paper-based analytical device for point-of-care nucleic acid quantification combining CRISPR/Cas12a and a personal glucose meter	Y. Tanifuji, G. Tong, Y. Hiruta and D. Citterio, Analyst, 2024, 149, 4932-4939
Ebola virus	Water	N.A.	-	N.A.	Colored length	N.A.	11 aM (water)	N.A.	285 min	Yes Multiple operations	Preincubation of CRISPR reaction	Pre–incubation Dilution Sample application Resistance measurement	Yes Amplification-related reagent CRISPR-related reagent	Incubator Digital Multimeter	5 µL	Programmable CRISPR-responsive smart materials	M. A. English, L. R. Soenksen, R. V. Gayet, H. de Puig, N. M. Angenent-Mari, A. S. Mao, P. Q. Nguyen and J. J. Collins, Science, 2019, 365, 780-78

## Sheet: Table S3 (Other targets)
Table S3 Recent examples of µPADs (2018-2025) for medical diagnostic applications (other targets)
This is an extended version of Table 3 in the main text
Columns not shown in the main text tables are indicated with light blue colour column headings
Analyte	Sample matrix	Real sample test	Sample type category	Concentration of measured clinical or spiked sample	Detection technique	Detection range	Detection limit	Storage stability	Assay time	Necessity of time control	Off-device pretreatment	Operation steps	Reagent handling	External equipment	Sample volume control	Mechanism	Article title	Ref
Uric Acid	Saliva	Clinical sample	4	10 – 80 ppm	Colorimetric	0–214.8 ppm (artificial saliva)	0.1 ppm (artificial saliva)	Air–tight sacks 4°C >3 months	<10 min	Yes Multiple operations	Pretreatment (surfactant additon, vortex and heating)	Sample application IPA application Water application Imaging	No	Smartphone Black box	10 µL	Ox/Red	Digital Quantification Method for Sensitive Point-of-Care Detection of Salivary Uric Acid Using Smartphone-Assisted μPADs	K. Fan, J. Zeng, C. Yang, G. Wang, K. Lian, X. Zhou, Y. Deng and G. Liu, ACS Sens., 2022, 7, 2049-2057
Hemoglobin	Human saliva	Clinical sample	5	0.01–107.40 μg/mL	Colorimetric intensity	1.57–2000 µg/mL	1.57 μg/mL	Sealed Room temperature >3 weeks	3 min	Yes Single reaction	No	Sample application Imaging	No	Mobile phone	38 µL	Enzyme	A Machine Learning-Driven Cyclic Optimizing Strategy for the Construction of Paper-Based Microfluidic Devices in the Early Diagnosis of Periodontitis	K. Lv, Y. Zhang, K. Tang, W. Huang, F. Chen, M. Chen, Y. Wang and J. Zhang, ACS Sens., 2025, 10, 7002–7013
Hemoglobin	Human saliva	Clinical sample	5	0.01–107.40 μg/mL	Colored distance	3–200, 200–2000 µg/mL	3 μg/mL	Sealed Room temperature >3 weeks	3 min	Yes Single reaction	No	Sample application Imaging	No	Mobile phone	34 µL	Enzyme	A Machine Learning-Driven Cyclic Optimizing Strategy for the Construction of Paper-Based Microfluidic Devices in the Early Diagnosis of Periodontitis	K. Lv, Y. Zhang, K. Tang, W. Huang, F. Chen, M. Chen, Y. Wang and J. Zhang, ACS Sens., 2025, 10, 7002–7013
Albumin	Human urine	Clinical sample	5	3.4–1025.4, 4246 mg/L	Colored distance	0–1000 mg/L (Artificial urine)	N.A.	In a desiccator Room temperature >2 months	15 min	No 15–45 min	No	Dipping	No	No	>3 mL (Dip)	Chelation	Paper-Based Device for Naked Eye Urinary Albumin/Creatinine Ratio Evaluation	R. Hiraoka, K. Kuwahara, Y.-C. Wen, T.-H. Yen, Y. Hiruta, C.-M. Cheng and D. Citterio, ACS Sens., 2020, 5, 1110-1118
Creatinine	Human urine	Clinical sample	5	239–2609 mg/L	Colored distance	0–3000 mg/L (Artificial urine)	N.A.	In a desiccator Room temperature >2 months	15 min	No 15–45 min	No	Dipping	No	No	>3 mL (Dip)	Chelation	Paper-Based Device for Naked Eye Urinary Albumin/Creatinine Ratio Evaluation	R. Hiraoka, K. Kuwahara, Y.-C. Wen, T.-H. Yen, Y. Hiruta, C.-M. Cheng and D. Citterio, ACS Sens., 2020, 5, 1110-1118
Glucose	Human whole blood	Clinical sample	5	5.4–12.4 mM	Colorimetric	2.5–50 mM (whole blood)	0.3 mM (whole blood)	N.A.	10 min	Yes Single reaction (without kinetic data)	No	Sample application Imaging	No	Smartphone	100 µL	Enzyme	Three-Dimensional Paper-Based Microfluidic Analytical Devices Integrated with a Plasma Separation Membrane for the Detection of Biomarkers in Whole Blood	C. Park, H.-R. Kim, S.-K. Kim, I.-K. Jeong, J.-C. Pyun and S. Park, ACS Appl. Mater. Interfaces., 2019, 11, 36428-36434
Glucose	Human whole blood	Clinical sample	5	63–146 mg/dL	Colorimetric	50–365 mg/dL (PBS)	N.A.	N.A.	30 min	Yes Multiple operations	No	Sample and buffer application Imaging	No	Scanner	1 µL	Enzyme	An innovative blood plasma separation method for a paper-based analytical device using chitosan functionalization	D. Kim, S. Kim and S. Kim, Analyst, 2020, 145, 5491-5499
Glucose	Human whole blood	Clinical sample	5	5.1–6.4 mM	Colorimetric	2.20–15.00 mM (whole blood)	0.12 mM (whole blood)	Sealed with a plastic film -4°C <40 days 89%	12 min	Yes Single reaction	No	Sample application Imaging	No	Home–made readout device (smartphone)	20 µL	Enzyme	Hydrogel Paper-Based Analytical Devices: Separation-Free In Situ Assay of Small-Molecule Targets in Whole Blood	J. Xu, H. Khan and L. Yang, Anal. Chem., 2021, 93, 14755-14763
Urea	Human whole blood	Clinical sample	5	2.46–38.14 mM	Colorimetric	2.46–38.14 mM (blood)	0.03 mM (blood)	35°C >8 days 96%	<2 min	Yes Single reaction	No	Sample application	No	Plastic cartridge Portable optizal reader	20 µL	Enzyme	A low-cost paper-based blood urea nitrogen optical biosensor for renal surveillance in fingertip blood	J. Cheng, Y. Fu, J. Guo and J. Guo, Sens. Actuators B: Chem., 2023, 387, 133795
Uric acid	Human whole blood	Clinical sample	5	0.1198–0.6401 mM	Colorimetric	0–1.5 mM (whole blood)	0.1127 mmol/L (whole blood)	Sealing and light avoidance 4°C <28 days	>10 min	No 10–24 min	No	Sample application Buffer application Imaging	No	Smartphone Box with light source	30 µL	Enzyme	Microfluidic Chip with Integrated Whole Blood Separation for Simultaneous Accurate Quantification of Multiple Chronic Kidney Disease Markers and Long-Term Monitoring	J. Yang, X. Feng, H. Li, P. Chang, X. Ren and X. Li, ACS Sens., 2025, 10, 5623–5632
Creatinine	Human whole blood	Clinical sample	5	58.8–1092.4 µM	Colorimetric	0–100 μM (whole blood)	0.2978 μmol/L (whole blood)	Sealing and light avoidance 4°C <28 days	>13 min	No 13–24 min	No	Sample application Buffer application Imaging	No	Smartphone Box with light source	30 µL	Dye	Microfluidic Chip with Integrated Whole Blood Separation for Simultaneous Accurate Quantification of Multiple Chronic Kidney Disease Markers and Long-Term Monitoring	J. Yang, X. Feng, H. Li, P. Chang, X. Ren and X. Li, ACS Sens., 2025, 10, 5623–5632
Albumin	Human whole blood	Clinical sample	5	33–50.9 mg/mL	Colorimetric	0–100 mg/mL (whole blood)	0.7696 mg/mL (whole blood)	Sealing and light avoidance 4°C <28 days	>6 min	No 6–24 min	No	Sample application Buffer application Imaging	No	Smartphone Box with light source	30 µL	Dye	Microfluidic Chip with Integrated Whole Blood Separation for Simultaneous Accurate Quantification of Multiple Chronic Kidney Disease Markers and Long-Term Monitoring	J. Yang, X. Feng, H. Li, P. Chang, X. Ren and X. Li, ACS Sens., 2025, 10, 5623–5632
Hemoglobin	Human whole blood	Clinical sample	5	N.A.	Colorimetric	2.5–15 g/dL	2.5 g/dL	Room temperature >8 hrs	<5 min	No Automated smartphone app	No	Sample application Auto–Imaging with smartphone	No	Plastic box Smartphone	around 10 µL (finger–pricked)	Enzyme	Smartphone-Enabled Paper-Based Hemoglobin Sensor for Extreme Point-of-Care Diagnostics	S. K. Biswas, S. Chatterjee, S. Bandyopadhyay, S. Kar, N. K. Som, S. Saha and S. Chakraborty, ACS Sens., 2021, 6, 1077-1085
Cardiac troponin I	Human whole blood	Clinical sample	4	<0.5 ~ 0.83 ng/mL	Colored distance	0.025–2.5 ng/mL (whole blood)	0.025 ng/mL (whole blood)	Sealed brown bag Room temperature >10 weeks >95%	15–30 min	No 15–30 min	Sample sterilization	Sample and buffer application	No	No	3 µL	Dye	Rapid Distance-Based Cardiac Troponin Quantification Using Paper Analytical Devices for the Screening and the Follow-Up of Acute Myocardial Infarction, Using a Single Drop of Human Whole Blood	K. Khachornsakkul and W. Dungchai, ACS Sens., 2021, 6, 1339-1347
Urea	Human saliva	Diluted clinical sample	3	<0.212–2.02 mM	Colorimetric	0.10–5.0 mM	0.032 mM	Under vacuum Room temperature <1 months 96%	35 min	No 35–120 min	10-fold dilution with synthetic saliva	Sample application Sealing Imaging	No	Scanner	15–25 µL	Enzyme	On-hand tool for ammonium and urea determination in saliva to monitor chronic kidney disease – Design of a couple of microfluidic paper-based devices	F. T. S. M. Ferreira, R. B. R. Mesquita and A. O. S. S. Rangel, Microchem. J., 2023, 193, 109102
NHx	Human saliva	Diluted clinical sample	3	<0.384–3.01 mM	Colorimetric	0.16–5.0 mM	0.049 mM	Under vacuum Room temperature >2 months 105%	15 min	No 15–60 min	10-fold dilution with synthetic saliva	Sample application NaOH application Sealing Imaging	Yes NaOH	Scanner	15–25 µL	pH change	On-hand tool for ammonium and urea determination in saliva to monitor chronic kidney disease – Design of a couple of microfluidic paper-based devices	F. T. S. M. Ferreira, R. B. R. Mesquita and A. O. S. S. Rangel, Microchem. J., 2023, 193, 109102
Zinc(II)	Human urine	Spiked into biofluid sample	2	0.115–1.419 mg/L	Colorimetric	50.0–750 μg/L (urine)	10 μg /L (urine)	Room temperature <7 days >90%	>5 min	No 5 min–2 hrs	2-fold dilution	Sample application Imaging	No	Scanner	15 µL	Dye	A microfluidic paper-based analytical device for the determination of zinc(II) in children’s urine samples and food zinc supplement solutions	M. M. P. Melo, A. O. S. S. Rangel and R. B. R. Mesquita, Talanta, 2026, 298, 128865
Histidine	Human urine	Spiked into biofluid sample	2	1–5 mM	FL–pixel	0.5–20 mM	0.021 mM	N.A.	>10 min (drying time not included)	Yes Multiple operations	No	Sample application Covering Peeling off Reagent application FL imaging	Yes BSA-AuCNs-Cu2+	Oven or hair dryer Imaging box Excitation light Smartphone	7 µL	Coffee–ring	Dual-Mode Undistorted Visual Fluorescent Sensing Strategy through Manipulating the Coffee-Ring Effect on Microfluidic Paper-Based Chip	J. Qi, B. Li, D. Lin, Z. Du, L. Fu, X. Wang, Z. Zhang, L. Luo and L. Chen, Anal. Chem., 2023, 95, 10486-10491
Histidine	Human urine	Spiked into biofluid sample	2	1–5 mM	FL–distance	0.5–20 mM	0.5 mM	N.A.	>10 min (drying time not included)	Yes Multiple operations	No	Sample application Covering Peeling off Reagent application FL imaging	Yes BSA-AuCNs-Cu2+	Oven or hair dryer Imaging box Excitation light Smartphone	7 µL	Coffee–ring	Dual-Mode Undistorted Visual Fluorescent Sensing Strategy through Manipulating the Coffee-Ring Effect on Microfluidic Paper-Based Chip	J. Qi, B. Li, D. Lin, Z. Du, L. Fu, X. Wang, Z. Zhang, L. Luo and L. Chen, Anal. Chem., 2023, 95, 10486-10491
Glucose	Human serum	Spiked into biofluid sample	2	5–11 mM	Colorimetric	5–11 mM (serum)	0.3 mM (PBS)	N.A.	5 min (buffer) 8 min (serum)	Yes Single reaction (without kinetic data)	(Blood separation)	Sample application Imaging	No	Camera	500 µL	Enzyme	Double-sided 3D printing on paper towards mass production of three-dimensional paper-based microfluidic analytical devices (3D-μPADs)	C. Park, Y. D. Han, H. V. Kim, J. Lee, H. C. Yoon and S. Park, Lab Chip, 2018, 18, 1533-1538
Cholesterol	Human serum	Spiked into biofluid sample	2	2.6–6.7 mM	Colorimetric	2.6–6.7 mM (serum)	0.2 mM (PBS)	N.A.	5 min (buffer) 8 min (serum)	Yes Single reaction (without kinetic data)	(Blood separation)	Sample application Imaging	No	Camera	500 µL	Enzyme	Double-sided 3D printing on paper towards mass production of three-dimensional paper-based microfluidic analytical devices (3D-μPADs)	C. Park, Y. D. Han, H. V. Kim, J. Lee, H. C. Yoon and S. Park, Lab Chip, 2018, 18, 1533-1538
Triglyceride	Human serum	Spiked into biofluid sample	2	1–2.3 mM	Colorimetric	1–2.3 mM (serum)	0.3 mM (PBS)	N.A.	5 min (buffer) 8 min (serum)	Yes Single reaction (without kinetic data)	(Blood separation)	Sample application Imaging	No	Camera	500 µL	Enzyme	Double-sided 3D printing on paper towards mass production of three-dimensional paper-based microfluidic analytical devices (3D-μPADs)	C. Park, Y. D. Han, H. V. Kim, J. Lee, H. C. Yoon and S. Park, Lab Chip, 2018, 18, 1533-1538
Secnidazole	Serum	Spiked into biofluid sample	2	0.1–300 μM	FL	0.1–300 μM	N.A. (117 nM in bulk)	N.A.	N.A.	N.A.	(Blood separation)	Sample application Drying FL measurement	No	Smartphone Excitation light	50 µL	FL quenching	Microfluidic Paper-Based Fluorescent Sensing Device Using Citric Acid Derived Carbon Dots-Tungsten Sulfide Spheres for On-site Detection of Secnidazole	S. Arif, M. Hassan, S. Rasheed, N. Ahmad, B. Fatima, S. G. Musharraf and D. Hussain, Biosens. Bioelectron., 2026, 291, 118025
Alkaline phosphatase (ALP)	Calf serum Human serum Goat serum	Spiked into biofluid sample	2	35, 105, 8 U/L	Echem (CA)	1–1000 U/L	1.4 U/L (buffer)	With desiccant Room temperature >4 weeks >70%	20 min (pre–incubation) 20 min (24 samples flow measurement)	Yes Single reaction	Centrifugation Pre–incubation	Pre-mixing sample and reagent Sample application Echem measurement	Yes (no reagent storage)	Potentiostat	10 µL	Enzyme	Paper-Based Laser-Pyrolyzed Electrofluidics: An Electrochemical Platform for Capillary-Driven Diagnostic Bioassays	L. Bezinge, J. M. Lesinski, A. Suea-Ngam, D. A. Richards, A. J. deMello and C.-J. Shih, Adv. Mater., 2023, 35, 2302893
H2O2	Artificial saliva	Spiked into artificial biofluid sample	1	5, 10 μM	Echem (CA)	0.25 μM to 5 mM (PBS)	0.15 μM (PBS)	>4 weeks 82.9%	110 s	No Immediate measurement	No	Sample application Echem measurement	No	Potentiostat	~400 μL	Enzyme	Development of an origami microfluidic paper-based analytical device for highly sensitive detection of dual biomarkers in artificial saliva	C. Chen, B. Ran, B. Liu, Y. Xiao, G. Tang, T. Shen, J. Liang and Z. Liang, Microchem. J., 2025, 210, 112966
Glucose	Artificial saliva	Spiked into artificial biofluid sample	1	100, 200 μM	Echem (CA)	2.5 μM to 3 mM	1.5 μM	In PBS 4°C <4 weeks 78.4%	110 s (only Echem measurement time)	No Immediate measurement	No	Sample application Echem measurement	No	Potentiostat	~400 μL	Enzyme	Development of an origami microfluidic paper-based analytical device for highly sensitive detection of dual biomarkers in artificial saliva	C. Chen, B. Ran, B. Liu, Y. Xiao, G. Tang, T. Shen, J. Liang and Z. Liang, Microchem. J., 2025, 210, 112966
Glucose	Artificial saliva	Spiked into artificial biofluid sample	1	15–200 mg/dL	Coloried distance (barcode)	15–200 mg/dL (artificial saliva)	15 mg/dL (artificial saliva)	N.A.	90 min	Yes Multiple operations	No	Sample application Drying Smartphone readout	No	Smartphone	80 µL	Enzyme	Development of a Semiquantitative Barcode Readout Approach for Paper-Based Analytical Devices (PADs) for Enzymatic H2O2 and Glucose Detection	Y. Manmana, S. Kinugasa, Y. Hiruta and D. Citterio, Anal. Chem., 2025, 97, 1500-1506
Glucose	Artificial urine	Spiked into artificial biofluid sample	1	1–100 mM	Colorimetric	0–20 mM (aritificial urine)	1 mM (aritificial urine)	N.A.	10–30 min	No No color degredation	No	Sample application	No	No	40 µL or 2 drops	Polymer degration	Traffic light type paper-based analytical device for intuitive and semi-quantitative naked-eye signal readout	S. Ohta, R. Hiraoka, Y. Hiruta and D. Citterio, Lab Chip, 2022, 22, 717-726
Ascorbic acid	Artificial urine	Spiked into artificial biofluid sample	1	0.1135 mM	Echem (CA)	0.15–0.8 mM (PBS, carriar buffer)	92.8 μM (PBS, carriar buffer)	N.A.	250 s	No Immediate measurement	No	Sample application Echem measurement	No	Potentiostat	1 µL	Ox/Red	3D Capillary-Driven Paper-Based Sequential Microfluidic Device for Electrochemical Sensing Applications	A. Yakoh, S. Chaiyo, W. Siangproh and O. Chailapakul, ACS Sens., 2019, 4, 1211-1221
Lithium ion	Human whole Blood (1.25-fold diluted)	Spiked into diluted biofluid sample	2	0–2.0 mM	Colorimetric	0–2.0 mM* (whole blood)	0.281 mM (whole blood)	N.A.	10 s (does not include blood wicking time)	No Immediate measurement	No	Sample application Placement of detection unit Imaging	No	(Camera)	10–20 µL	Dye	Paper-Based Device for the Facile Colorimetric Determination of Lithium Ions in Human Whole Blood	T. Komatsu, M. Maeki, A. Ishida, H. Tani and M. Tokeshi, ACS Sens., 2020, 5, 1287-1294
DNA adenine methylation Mtase (Dam MTase)	Human serum (5-fold diluted)	Spiked into diluted biofluid sample	2	30–70 U/mL	FL	1.0–90 U/mL (buffer)	0.11 U/mL (buffer)	>10 days	35 min	Yes Multiple operations	(Blood separation)	Pre-mixing of sample and reagent Sample application Reagent addition FL measurement	Yes Fluorescent dye	FL meter	~7 µL (no details)	Enzyme	Paper-based fluorescence chip with umbellately anchored dimeric G-quadruplex coupled DNA tetrahedron-structured probe for sensing DNA methyltransferase	M. Wang, J. Qi, F. Li, Y. Liu, J. Xiang, B. Li, X. Zhuang, L. Chen and X. Fu, Sens. Actuators B: Chem., 2026, 446, 138643
Nicotinamide adenine dinucleotide phosphate (NADPH)	Simulated urie Human serum (10-fold diluted)	Spiked into diluted biofluid sample	2	0.01−1.0 mM	Echem (CA)	0.01–1.0 mM, 1.0–4.0 mM (urine and serum)	3.75 μM (buffer)	Sealed in aluminum bags 55°C >7 days (ambient condition for 56 days) 99.8%	<10 min (5 samples with flow measurement)	No Immediate measurement	No	Buffer application Sample application Echem measurement	No	Potentiostat	10 µL	Ox/Red	Paper-Based Fast-Flow Electrochemical Device Enabling Self-Calibrated and High-Throughput NADPH Measurements	N. Thueankhum, L. Hongtanee, U. Boonyuen, A. Yakoh and K. Charoenkitamorn, Anal. Chem., 2025, 97, 20771–20779
L-Tryptophan (Trp)	Human serum (depotenized) Human urine (centrifuged and 10-fold diluted)	Spiked into diluted biofluid sample	2	0.075–0.125 mM	Colorimetric	0.25–1.5 mM	220.7 μM	N.A.	15 min	Yes Multiple operations	(Blood separation)	Sample application Centrifugation twice Reagent application Imaging	Yes ZIF-8-His-MIP-Gel Au-Nos-D,L-Ala	Centrifuge Smartphone	N.A.	AuNP aggregation	Paper-based microfluidic system and chiroptical functionalized gold nano-oval for colorimetric detection of L-Tryptophan	M. Karimian, K. Dashtian, R. Zare-Dorabei and S. Norouzi, Anal. Cheim. Acta, 2024, 1285, 342022
Albumin	Human serum (2-fold diluted)	Spiked into diluted biofluid sample	2	1.5–18.0 g/L	Colored distance, angle	1–25 g/L (PBS)	0.8 g/L (PBS)	N.A.	30 min	No 30–40 min	(Blood separation)	Sample and buffer application	No	No	5 µL	Dye enzyme	Distance-Based Paper Device for a Naked-Eye Albumin-to-Alkaline Phosphatase Ratio Assay	K. Phoonsawat, K. Khachornsakkul, N. Ratnarathorn, C. S. Henry and W. Dungchai, ACS Sens., 2021, 6, 3047-3055
Alkaline phosphatase (ALP)	Human serum (2-fold diluted)	Spiked into diluted biofluid sample	2	12.5–140.0 U/L	Colored distance, angle	5–50 U/L and 50–200 U/L (PBS)	5 U/L (PBS)	N.A.	30 min	No 30–40 min	(Blood separation)	Sample and buffer application	No	No	5 µL	Dye enzyme	Distance-Based Paper Device for a Naked-Eye Albumin-to-Alkaline Phosphatase Ratio Assay	K. Phoonsawat, K. Khachornsakkul, N. Ratnarathorn, C. S. Henry and W. Dungchai, ACS Sens., 2021, 6, 3047-3055
Serotonin (5-HT)	Buffer	N.A.	-	N.A.	Echem (CA)	1–20 mM (PBS)	0.15 mM (PBS)	N.A.	13 min	Yes Multiple operations	N.A.	Reagent application Washing Sample application Moving PAD Echem measurement	Yes K[AuCl4]	Potentiostat	1 µL	Ox/Red	3D Capillary-Driven Paper-Based Sequential Microfluidic Device for Electrochemical Sensing Applications	A. Yakoh, S. Chaiyo, W. Siangproh and O. Chailapakul, ACS Sens., 2019, 4, 1211-1221
Cardiac troponin I (cTnI)	PBS	N.A.	-	N.A.	SERS	0–0.5 ng/ mL (PBS)	0.02 ng/mL (PBS)	N.A.	<90min	No Automated sequential reagent addition	N.A.	Sample and buffer application SERS measurement	No	SERS spectrophotometer	75 µL	Aptamer	Paper Microfluidic Device with a Horizontal Motion Valve and a Localized Delay for Automatic Control of a Multistep Assay	D. Tu, A. Holderby, J. Dean, S. Mabbott and G. L. Coté, Anal. Chem., 2021, 93, 4497-4505
						*estimated from figures
